# Supplementary material for: Influences of downward transport and photochemistry on surface ozone over East Antarctica during austral summer: in situ observations and model simulations
Source: Copernicus journal article supplement (doi:10.5194/acp-24-1979-2024), 2024-02-14
Supplement: Supplementary file 1 [file acp-24-1979-2024-supplement.pdf]

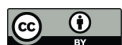

*Supplement of*

## **Influences of downward transport and photochemistry on surface ozone over East Antarctica during austral summer: in situ observations and model simulations**

**Imran A. Girach et al.**

*Correspondence to:* Imran A. Girach ([imran.girach@gmail.com](mailto:imran.girach@gmail.com)) and Andrea Pozzer ([andrea.pozzer@mpic.de](mailto:andrea.pozzer@mpic.de))

The copyright of individual parts of the supplement might differ from the article licence.

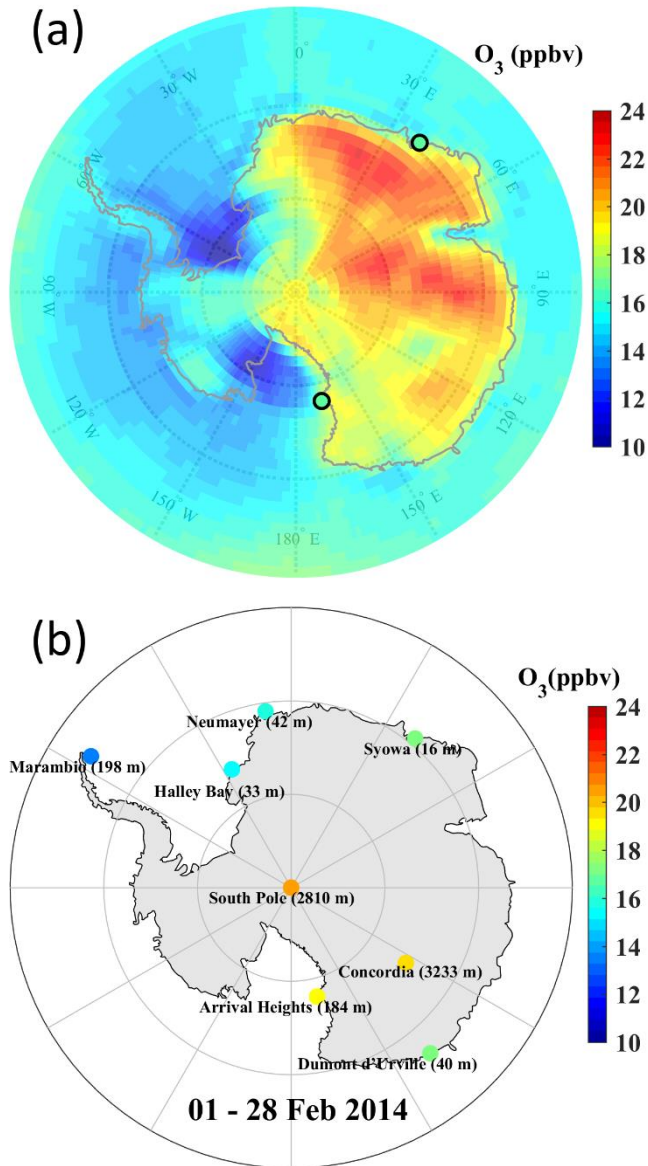

Figure S1: (a) Spatial distribution of EMAC simulated surface  $O_3$  averaged over the study period. Colour inside the black circle represent the average value from in situ measurements over Syowa and Arrival Heights. (b) Spatial distribution of in situ measured surface  $O_3$  averaged over 01–28 February 2014. Spatial heterogeneity is in line with the distribution simulated with EMAC. Surface ozone observations at Antarctic stations (South Pole, United States; Arrival Heights, New Zealand; Marambio, Argentina; Syowa station, Japan) were obtained from the World Data Centre for Reactive Gases (WDCRG), WMO's GAW (Global Atmosphere Watch; World Meteorological Organization) programme (<https://ebas.nilu.no/>, last access: 1 January 2024 and <https://ebas-data.nilu.no/Default.aspx>, last access: 1 January 2024), and Legrand et al., 2016.

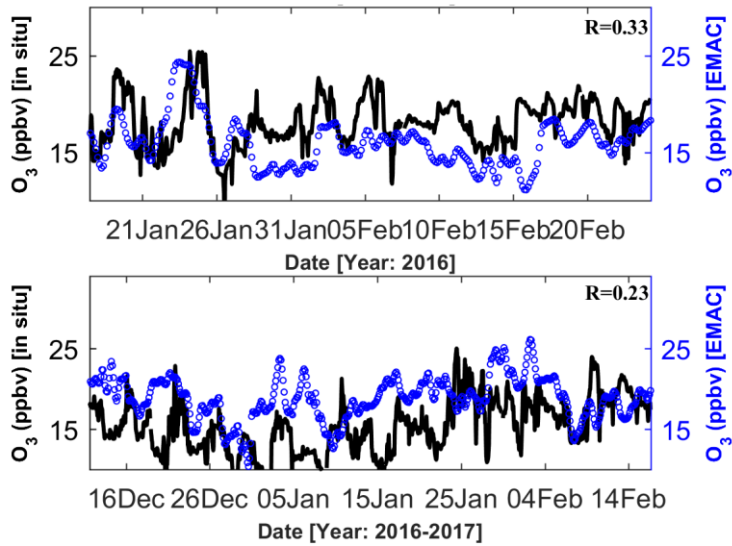

**Figure S2: In situ (black) and EMAC simulated (blue) surface O<sub>3</sub> at Arrival Height during austral summer of 2016–2017.**

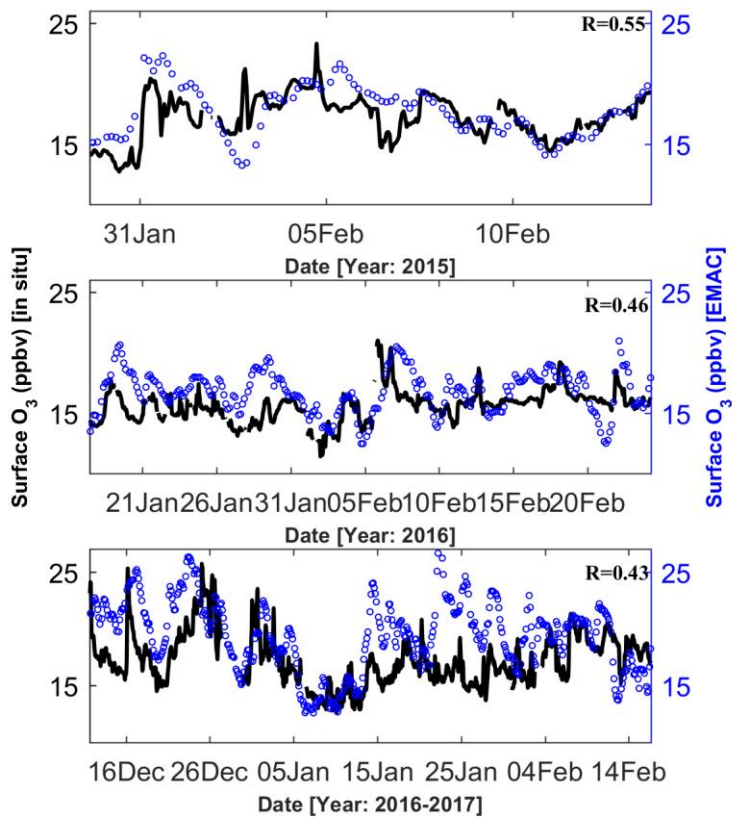

**Figure S3: In situ (black) and EMAC simulated (blue) surface O<sub>3</sub> at Syowa during austral summer of 2016–2017.**

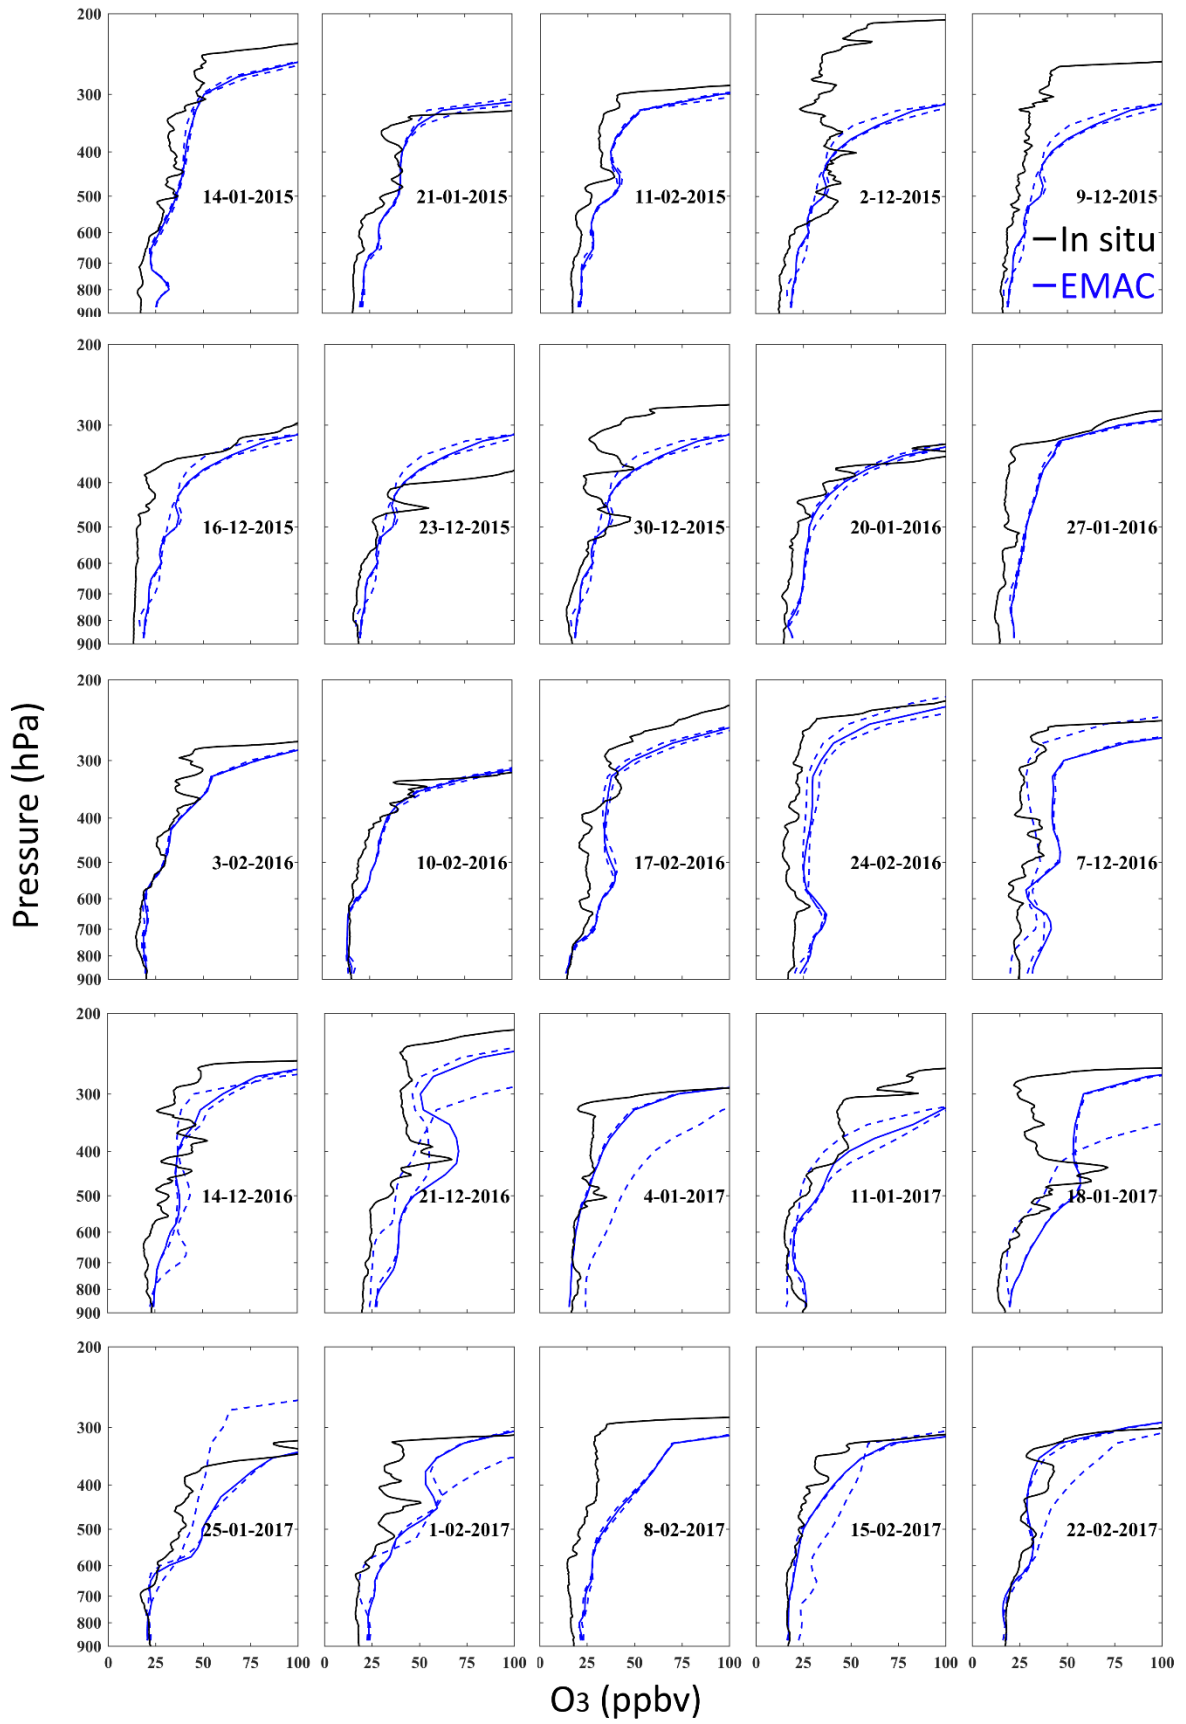

**Figure S4: In situ (black) and EMAC simulated (blue) vertical profile of O<sub>3</sub> at Davis station. Dashed blue curves represent O<sub>3</sub> profiles 3 h prior and after the time of ozonesonde launch.**

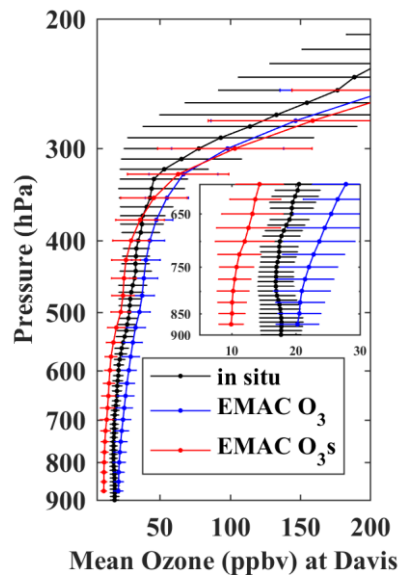

**Figure S5: Vertical distribution of O<sub>3</sub> (black: in situ and blue: EMAC) and O<sub>3</sub>s (red: EMAC) averaged over profiles shown in figure S4 at Davis station.**

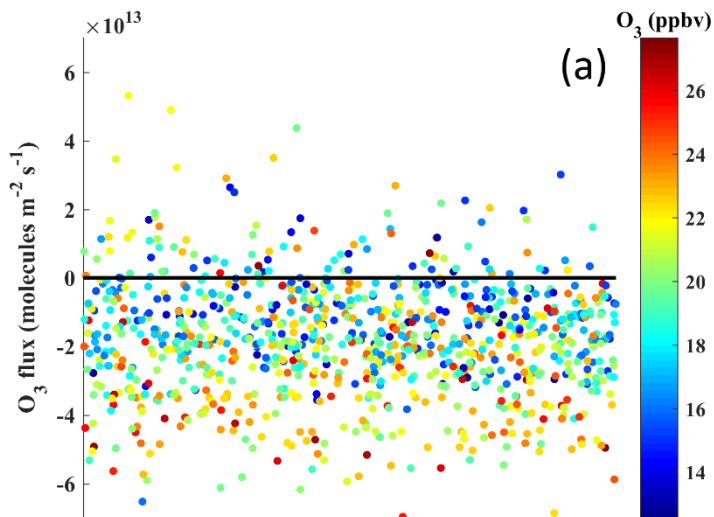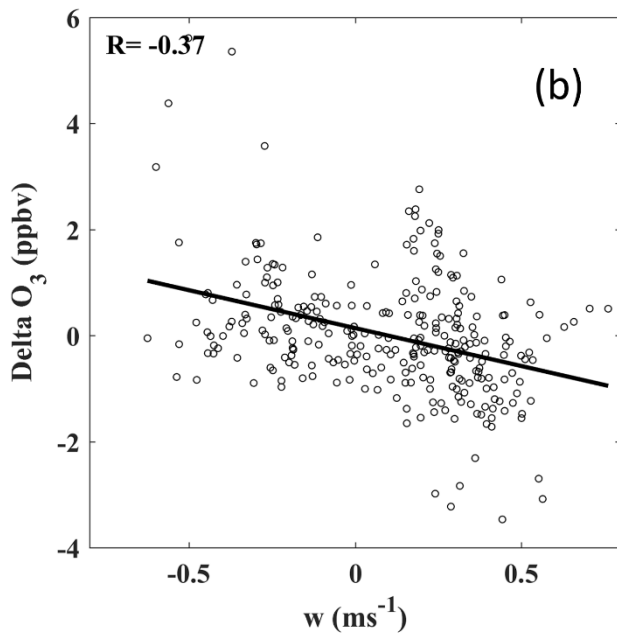

**Figure S6: (a) Distribution of measured  $O_3$  mixing ratio with respect to EMAC simulated  $O_3$  fluxes during the study period. Larger downward fluxes are corresponding to frequent higher  $O_3$  mixing ratio. (b) Scatter plot between in situ measured vertical wind and  $\Delta O_3$  during 18–29 January 2016.**

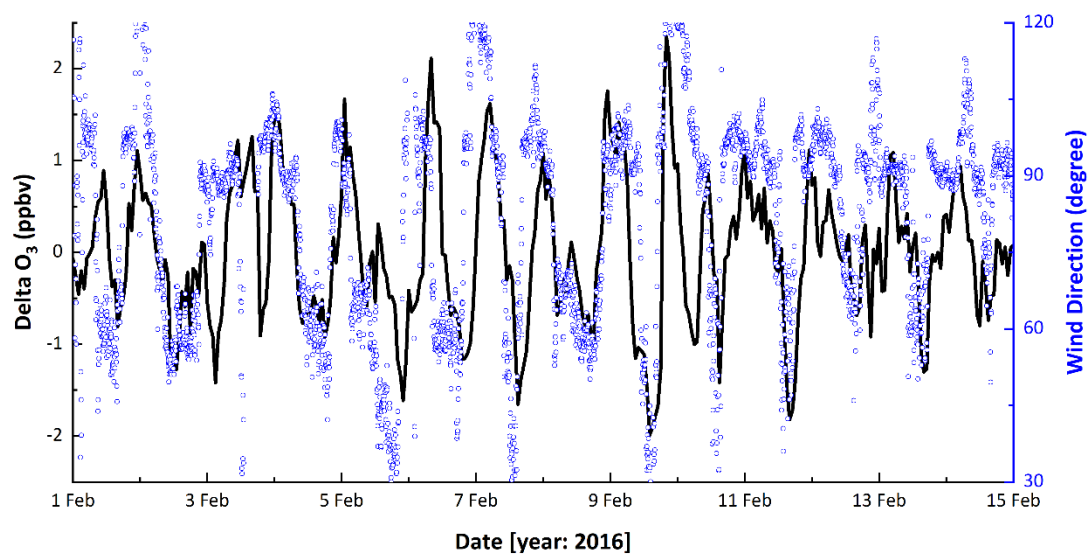

Figure S7: Variations in  $\Delta O_3$  and wind direction at Bharati during summer 2016.

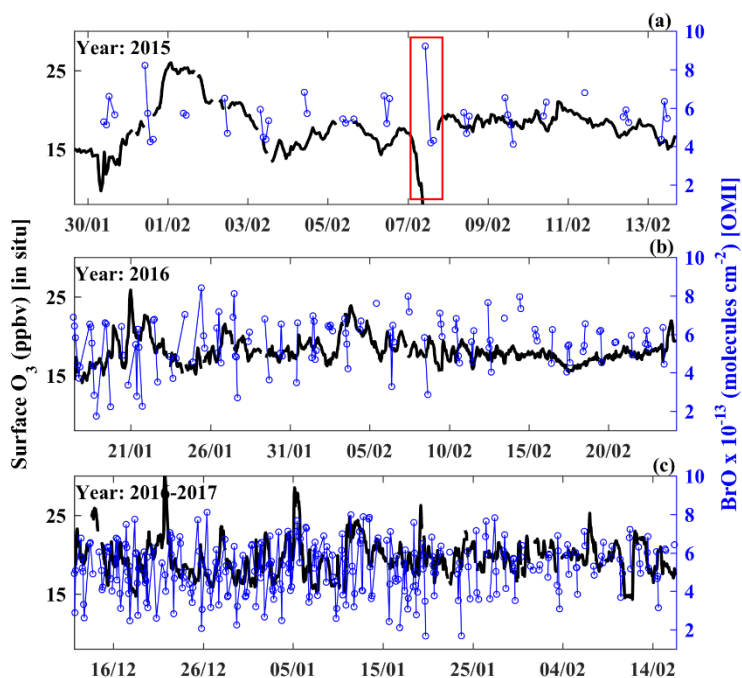

Figure S8: Variations in surface  $O_3$  at Bharati and OMI-derived BrO column around Bharati ( $\pm 0.5^\circ$  latitude/longitude) during austral summer. Red rectangle mark the  $O_3$  depletion event coinciding with enhanced BrO.

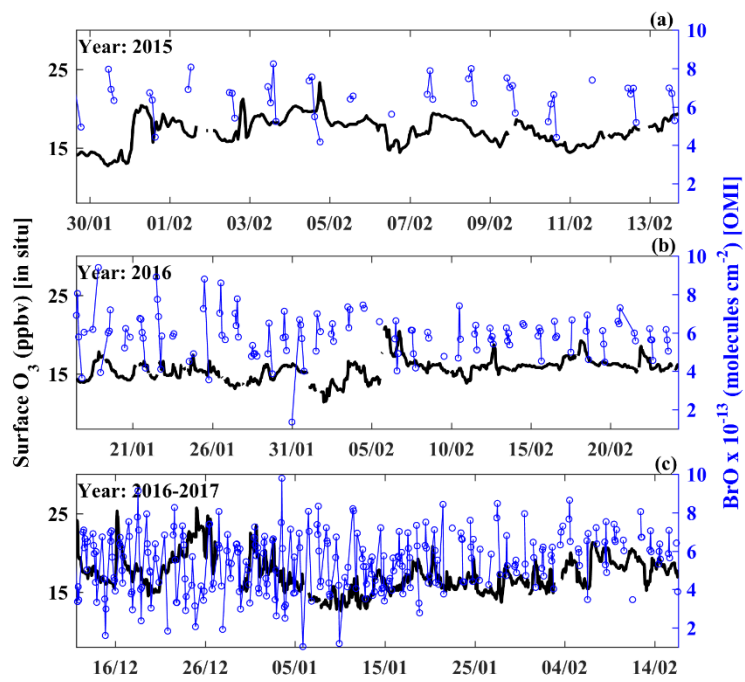

**Figure S9: Same as S8 but for Syowa station.**



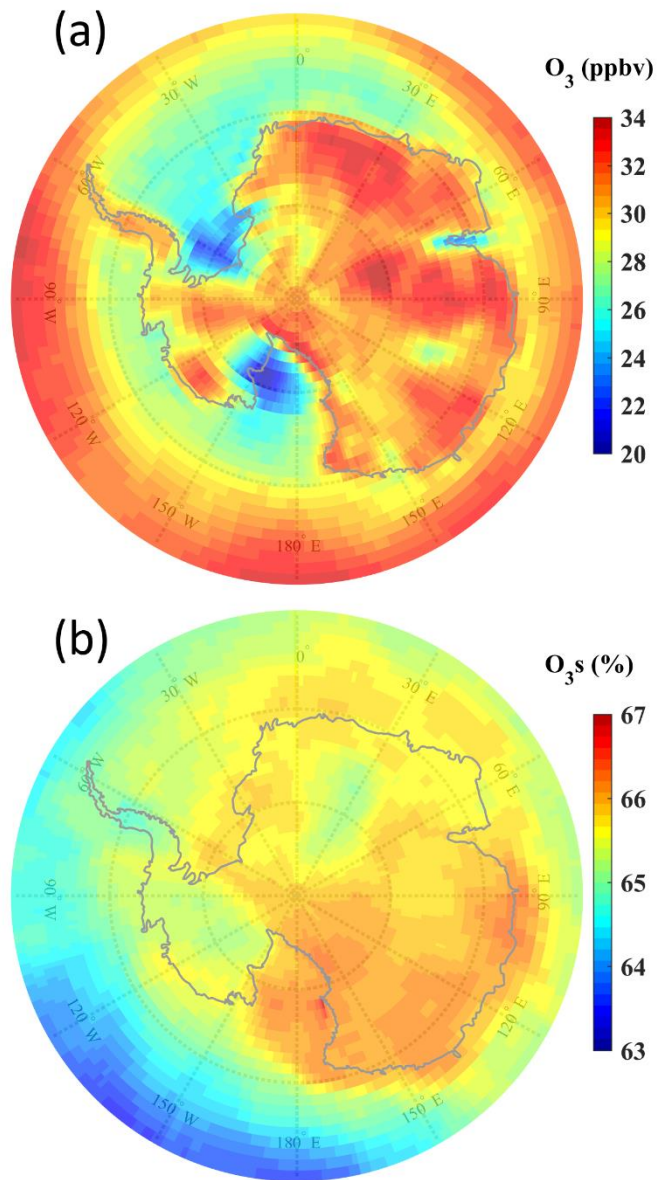

**Figure S10: EMAC simulated wintertime distribution of surface  $O_3$  and  $O_3s$  over the Antarctic region (July of 2015–2017).**

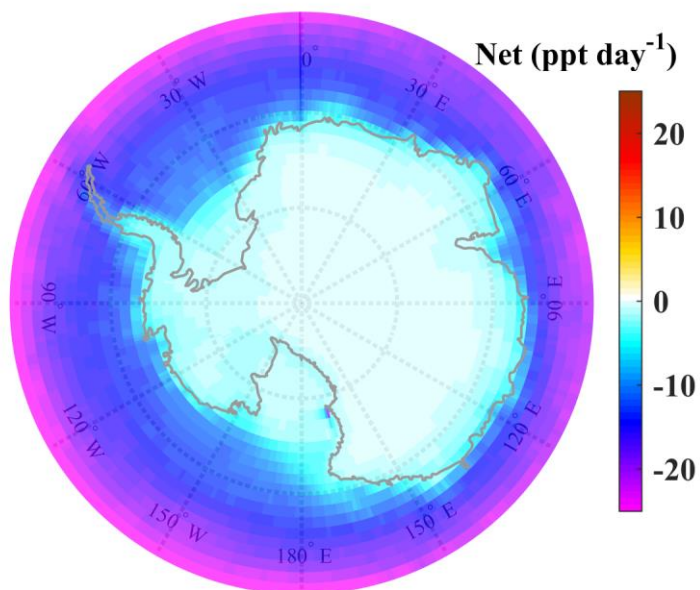

**Figure S11: Spatial distribution of net rate of change (production minus loss) of surface O<sub>3</sub> due to photochemistry during winter (July of 2015–2017).**

### Reference

Legrand, M., Preunkert, S., Savarino, J., Frey, M. M., Kukui, A., Helmig, D., Jourdain, B., Jones, A. E., Weller, R., Brough, N., and Gallée, H.: Inter-annual variability of surface ozone at coastal (Dumont d'Urville, 2004–2014) and inland (Concordia, 2007–2014) sites in East Antarctica, *Atmos. Chem. Phys.*, 16, 8053-8069, doi: 10.5194/acp-16-8053-2016, 2016.
